# Supplementary material for: Drag reduction for viscous laminar flow on spray-coated non-wetting surfaces
Source: Royal Society of Chemistry journal article supplement (doi:10.1039/c3sm50445j), 2013-01-01
Supplement: c3sm50445j.pdf [file c3sm50445j.pdf]

**Electronic Supporting Information for *Soft Matter***

# Drag Reduction for Viscous Laminar Flow on Spray-Coated Non-Wetting Surfaces

*Siddarth Srinivasan,<sup>a</sup> Wonjae Choi,<sup>b</sup> Kyoo-Chul Park,<sup>c</sup> Shreerang S. Chhatre,<sup>a</sup> Robert E. Cohen<sup>\*a</sup> and Gareth H. McKinley<sup>\*c</sup>*

<sup>a</sup> Department of Chemical Engineering, Massachusetts Institute of Technology, USA

<sup>b</sup> Department of Mechanical Engineering, University of Texas at Dallas, USA

<sup>c</sup> Department of Mechanical Engineering, Massachusetts Institute of Technology, USA

\*Corresponding Authors: Email; [gareth@mit.edu](mailto:gareth@mit.edu) (G.H.M); [recohen@mit.edu](mailto:recohen@mit.edu) (R.E.C)

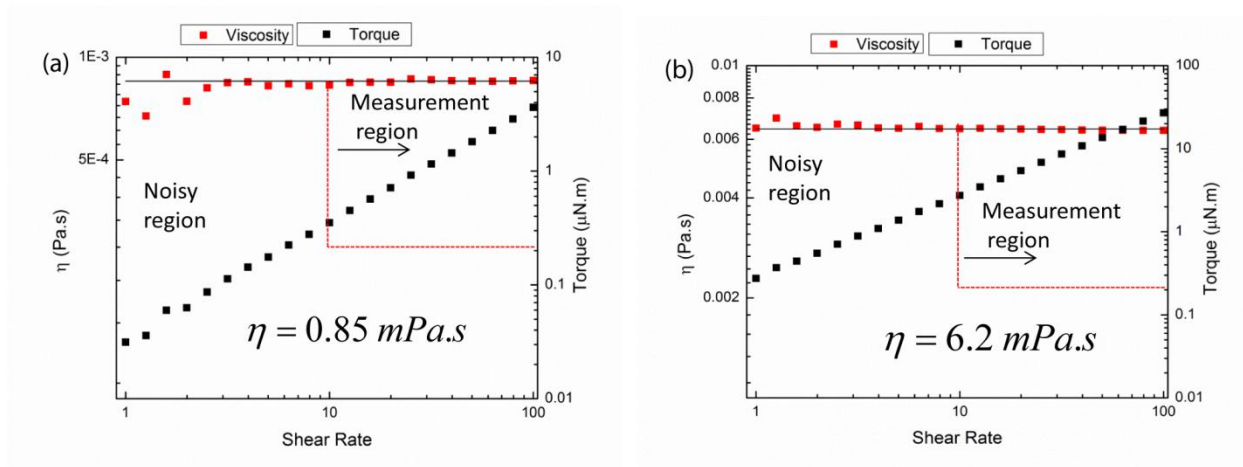

**Figure S1.** Measured values of the viscosity ( $\eta$ ; red squares) and torque (black squares) plotted against the nominal shear rate  $\dot{\gamma}$  at 25° C of: (a) n-Decane, a reference Newtonian oil with  $\eta = 0.85 \text{ mPa}\cdot\text{s}$ , and (b) the 50 vol% Glycerol/Water probe liquid with  $\eta = 6.2 \text{ mPa}\cdot\text{s}$ . The data clearly indicates noise in measured values of viscosity and torque for shear rates  $\dot{\gamma} < 10 \text{ s}^{-1}$ . Therefore, the values of measured torques used in this study range from 3-30  $\mu\text{N}$  for shear rates of  $10 \text{ s}^{-1} < \dot{\gamma} < 100 \text{ s}^{-1}$ .

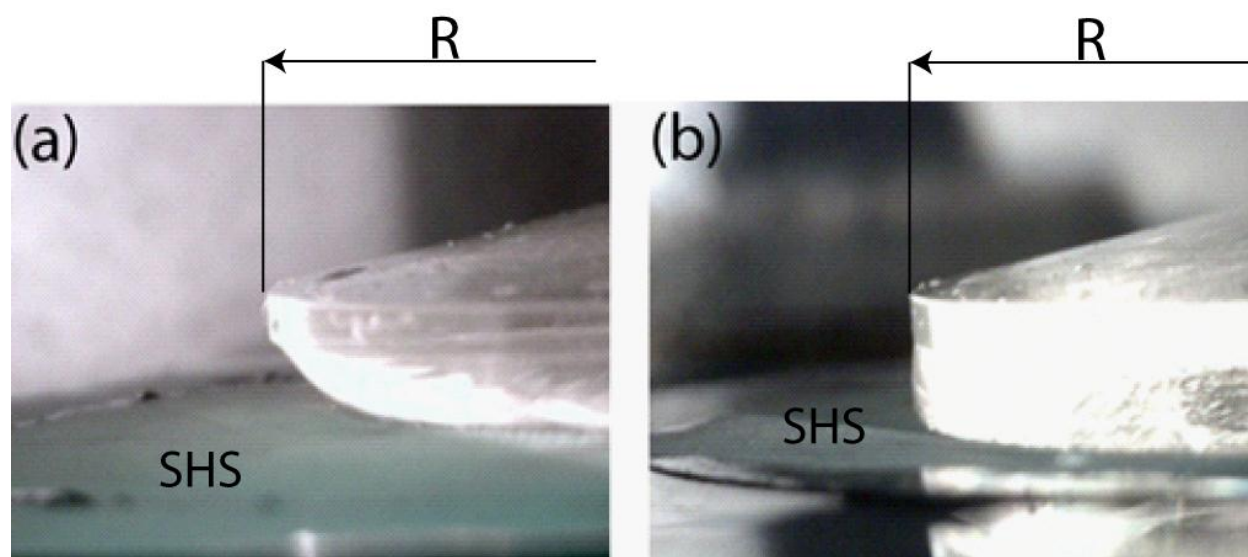

**Figure S2.** A side view of the liquid meniscus resting on the spray-coated superhydrophobic substrate (SHS) at the edge of the parallel-plate rheometer (at a radius  $R=30$  mm) with the meniscus shown to be: (a) freely deformed due to the large apparent contact angle on the ‘as-sprayed’ SHS (b) pinned at the edge of the parallel plate (at  $R=30$  mm) by introduction of a thin hydrophilic strip at the edge of the SHS (of width  $\sim 200 \mu\text{m}$ ) by indentation with a graphite tip.

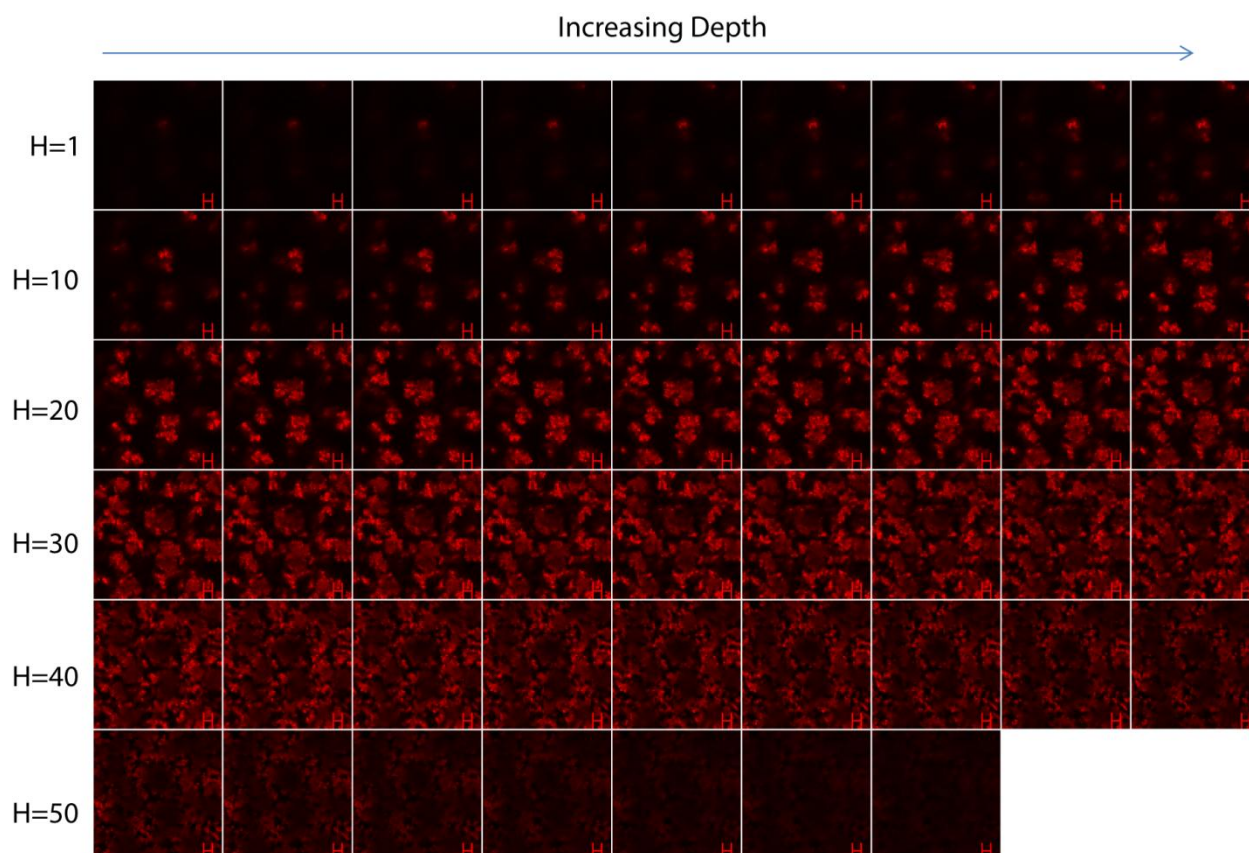

**Figure S3.** Array of confocal microscopy images of the spray-coated corpuscular structure infused with a Nile red fluorescent dye. Each image is of dimensions  $143\mu m \times 143\mu m$  and the total height of the stacked images is  $56\mu m$ . The images in each row are sequentially ordered from left to right, with the image slice at the top-left corresponding to an imaging plane located at the top of the spray-coated microstructures. Subsequent slices correspond to successively lowering the imaging plane by a height  $\Delta H \sim 1\mu m$ .

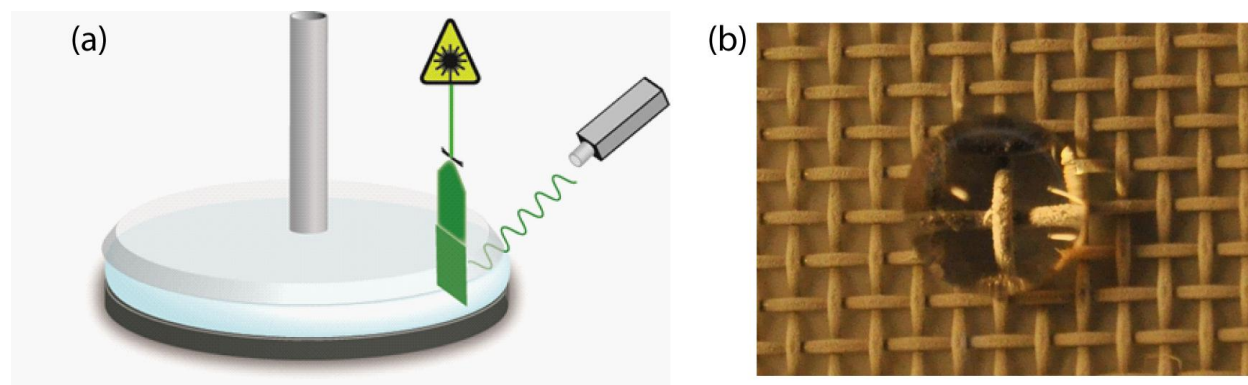

**Figure S4.** (a) Schematic of the imaging setup used to capture the composite solid-liquid-vapor interface (as shown in Fig. 6c in the main text) resting on the spray-coated superhydrophobic mesh in the parallel-plate rheometer. The image is captured at an oblique angle looking through a beveled edge of the transparent upper plate of the rheometer; (b) A liquid drop of volume  $V \sim 10 \mu\text{L}$  sitting in the Cassie-Baxter state on a superhydrophobic spray-coated Mesh

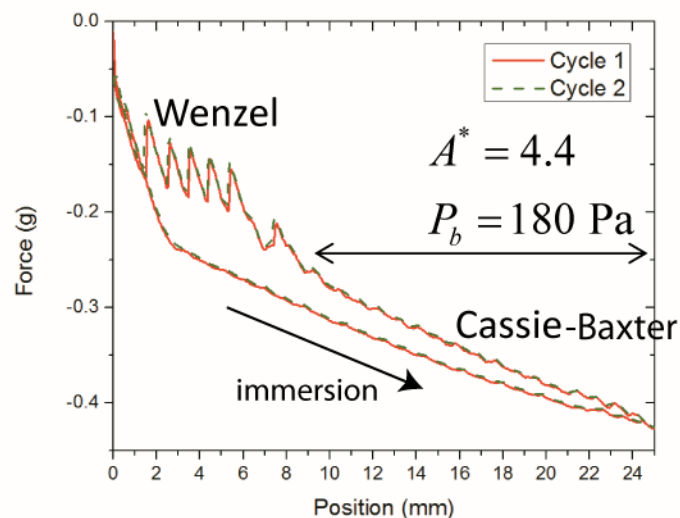

**Figure S5.** Plot of the force trace of the spray-coated Mesh III ( $R = 127 \mu\text{m}$ ;  $D = 326 \mu\text{m}$ ;  $L = 2(R+D) = 906 \mu\text{m}$ ) vertically immersed in a 50 vol% glycerol/water solution using a dynamic tensiometer (DataPhysics Instruments, DCAT 11). The transition from a Cassie-Baxter state to a Wenzel state in the large pockets of air trapped in between the woven features of the spray-coated mesh is evident from the large hysteresis seen in the force curves at a vertical immersion depth of  $z = 9 \text{ mm}$ , corresponding to a hydrostatic breakthrough pressure of approximately 180 Pa. The value of the dimensionless breakthrough pressure  $A^*$  (calculated from Eqn. 5) is 4.4. The spray-coated mesh dewets completely when the hydrostatic pressure loading is removed and the second immersion cycle is identical to the first.
